# Supplementary material
Source: PubMed Central journal article supplement (PMC3046583)
Supplement: pp.110.171322_1.pdf [file pp.110.171322_1.pdf]

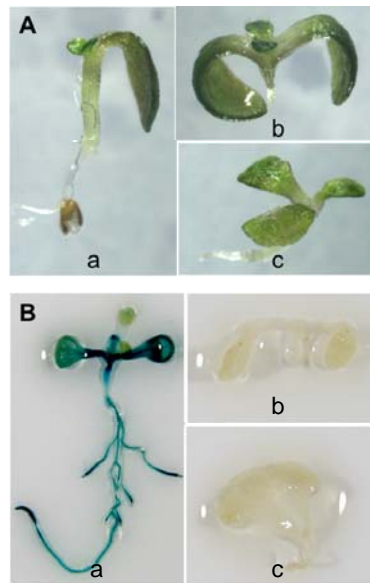

**Supplemental Figure S1.** T1 transgenic seedlings expressing *35S:IAA19mII* in *DR5:GUS* background.

**(A)** Phenotypes of T1 seedlings. Single cotyledon (a), defective primary root (b) and triple cotyledons (c).

**(B)** GUS staining for *DR5:GUS* (a) and *35S:IAA19mII X DR5:GUS* (b and c) treated with 50  $\mu$ M NAA for 15 h.
