# Supplementary material
Source: PubMed Central journal article supplement (PMC3046583)
Supplement: pp.110.171322_2.pdf [file pp.110.171322_2.pdf]

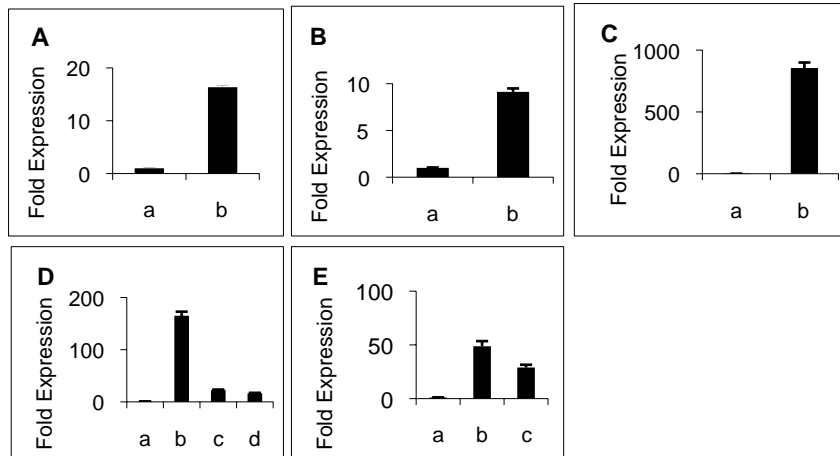

**Supplemental Figure S2.** Quantitative RT-PCR analysis of expression levels for IAA transgenes in Arabidopsis seedlings.

**(A)** Relative *35S:IAA17mImlI-1* (b) transgene expression compared to *IAA17* gene expression in nontransformed seedlings (a).

**(B)** Relative *35S:IAA3mImlI-1* transgene expression (b) compared to *IAA3* gene expression in nontransformed seedlings (a).

**(C)** Relative *35S:IAA6mImlI-1* transgene expression (b) compared to *IAA6* gene expression in nontransformed seedlings (a).

**(D)** Relative *35S:IAA19mImlI-1* (b), *IAA19:IAA19mImlI-1* (c) and *IAA19:VP16-IAA19mImlI-1* (d) transgene expression compared to *IAA19* gene expression in nontransformed seedlings (a).

**(E)** Relative *35S:IAA12mImlI-2* (b) and *35S:IAA12mImlI-3* (c) transgene expression compared to *IAA12* gene expression in nontransformed seedlings (a).
