# Supplementary material
Source: PubMed Central journal article supplement (PMC3046583)
Supplement: pp.110.171322_3.pdf [file pp.110.171322_3.pdf]

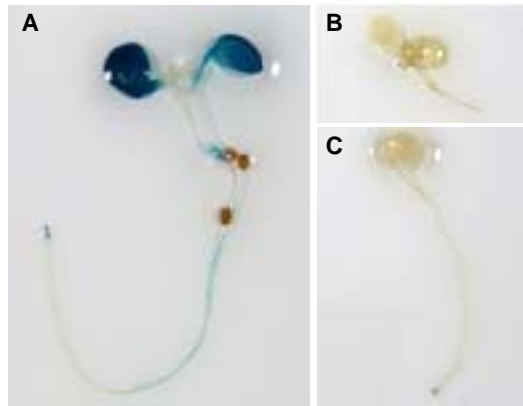

**Supplemental Figure S3.** T1 transgenic seedlings expressing *35S:IAA12mImlI-1* in *DR5:GUS* background.

*DR5:GUS* (A) and T1 seedlings of *35S:IAA12mImlI-1* X *DR5:GUS* (B and C) treated with 10  $\mu$ M NAA for 15 h.
