# Supplementary material
Source: PubMed Central journal article supplement (PMC3046583)
Supplement: pp.110.171322_4.pdf [file pp.110.171322_4.pdf]

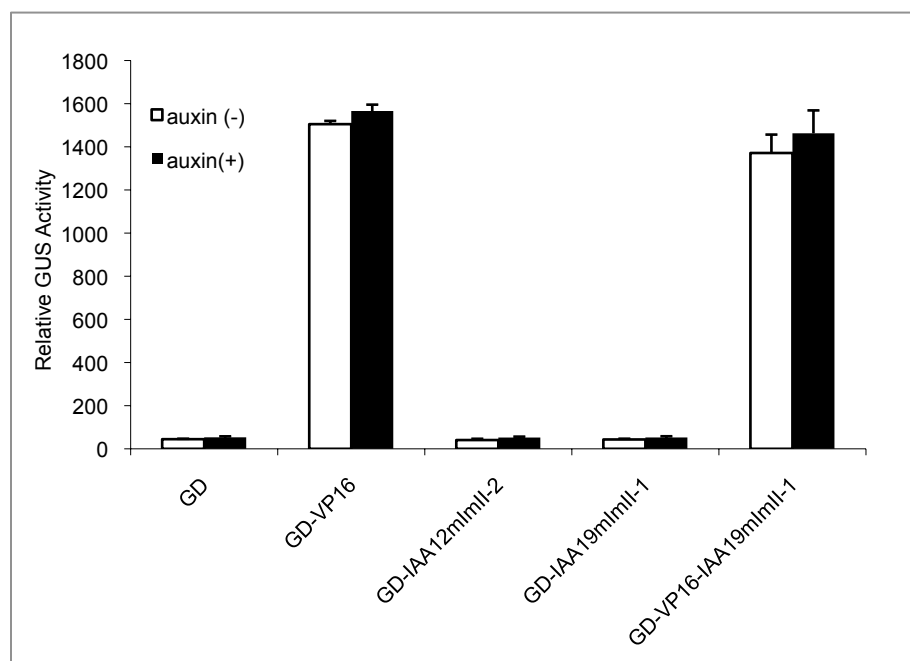

**Supplemental Figure S4.** Activation domain assays in Arabidopsis protoplasts.

Activation domain assays were carried out using co-transfection with a *GAL4:GUS* reporter gene and effector genes encoding GD (GAL4-DNA binding domain) alone or GD fused to VP16, IAA12mImlI-2, IAA19mImlI-1, or VP16-IAA19mImlI-1. Assays were carried out as described by Tiwari et al. (2001; 2003; 2004) in the presence or absence of 1 $\mu$ M NAA.
