# Supplementary material
Source: PubMed Central journal article supplement (PMC3046583)
Supplement: pp.110.171322_5.pdf [file pp.110.171322_5.pdf]

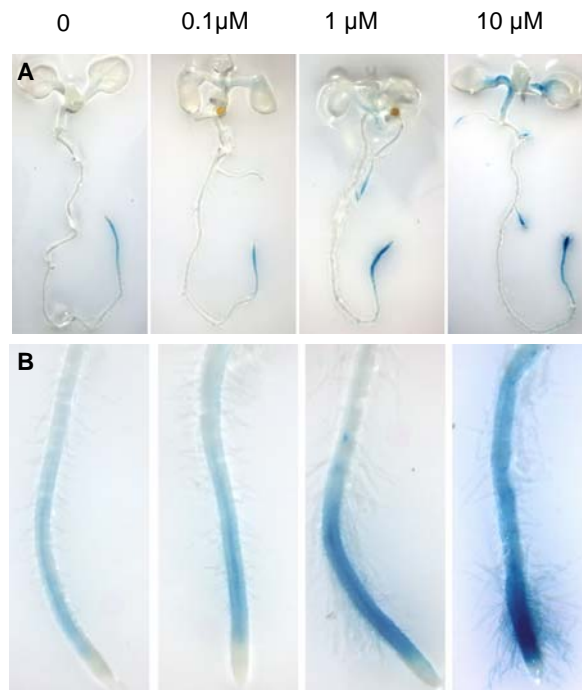

**Supplemental Figure S5.** Analysis of seedlings transformed with the *IAA19:GUS* reporter gene.

**(A)** Seven-day-old seedlings were removed from agar plates and incubated for 6 h in water or 1-NAA at the concentration indicated and then histochemically stained for GUS for 15 h at room temperature.

**(B)** Magnification of the primary root tips of seedlings (shown in A) stained for GUS.
