# Supplementary material
Source: PubMed Central journal article supplement (PMC3046583)
Supplement: pp.110.171322_7.pdf [file pp.110.171322_7.pdf]

| Classification           | Direction | Sequence(5'-3')            |
|--------------------------|-----------|----------------------------|
| IAA3                     | Forward   | GCTGAGGCTGGGATTAC          |
|                          | Reverse   | CCATACTTACTTTACATAGATTC    |
| IAA3 <i>mImI-1</i>       | Forward   | GATACCCTTACGATGTTCTGA      |
|                          | Reverse   | GAGGAGGGGATGTTTCAGTTTT     |
| IAA6                     | Forward   | CTGCCGTTGTGAAGAGT          |
|                          | Reverse   | TCCGACGAGCATCCAGT          |
| IAA6 <i>mImI-1</i>       | Forward   | GATACCCTTACGATGTTCTGA      |
|                          | Reverse   | ATCCCACCGCTTGACTCTTC       |
| IAA12                    | Forward   | TTGGGTCTAAACGCTCTGCT       |
|                          | Reverse   | AAGCCCTGAACTTTCCGATT       |
| IAA12 <i>mImI-2/3</i>    | Forward   | CCCTTACGATGTTCTGATTA       |
|                          | Reverse   | AAGCCCTGAACTTTCCGATT       |
| IAA17                    | Forward   | GGTACCATGATGGGCAGTGTCGAG   |
|                          | Reverse   | CCATGGAGCTCTGCTCTTGCACTT   |
| IAA17 <i>mImI-1</i>      | Forward   | CCCTTACGATGTTCTGATTA       |
|                          | Reverse   | CCATGG AGCTCTGCTCTTGCACTT  |
| IAA19                    | Forward   | ATGGAGAAGGAAGGACTCGGGCTTG  |
|                          | Reverse   | GTCTTCGTATATGGTAACGTATTCGC |
| IAA19 <i>mImI-1</i>      | Forward   | CCCTTACGATGTTCTGATTA       |
|                          | Reverse   | ACAAACCGGTGACCACCCC        |
| VP16-IAA19 <i>mImI-1</i> | Forward   | CAGATGTTTACCGATGCCCT       |
|                          | Reverse   | ACAAACCGGTGACCACCCC        |
| CBP20                    | Forward   | ACTGGCTCATTGGGAGCTTA       |
|                          | Reverse   | CATCTTACCATCGTCATCG        |
| TUB5                     | Forward   | AACCATTTGATCTCCGCAAC       |
|                          | Reverse   | TGGAGTCCCACATTTGTTGA       |

**Supplemental Table.** Primer pairs used for qRT-PCR.
